# Supplementary material for: Effects of glycopyrronium bromide versus anisodamine hydrobromide in preventing nausea and vomiting and relieving spasm after ERCP: a randomized controlled trial
Source: PeerJ. 2025 Jul 1;13:e19582. doi: 10.7717/peerj.19582 (PMC12226988; doi:10.7717/peerj.19582)
Supplement: Supplemental Information 1 [file peerj-13-19582-s001.xlsx]

## Sheet: Original data of ERCP
Serial number	random	Rrandom	Group（0 is group G ，1 is group A）	Preoperative diagnosis (biliary obstruction is 1, pancreatic mass is 2)	Sex	Age(yr)	Age<50yr，Yes/No	H（cm）	H（m）	W(kg)	BMI	BMI≥24,Yes/No	Apfel score	Smoking，Yes/No	Kinesia history，Yes/No	ASA	Remimazolam ( mg)	Sufentanil ( ug )	Rocuronium bromide ( mg )	Cisatracurium ( mg )	Propofol ( mg )	Remifentanil ( mg )	ERCP/LC（ERCP is 1，ERCP+LC is 2）	ENBD（Yes/No）	Operation time (h)	Operation time≥2h	Duration of ERCP operation(h)	frequency of duodenal contractions	Spasticity scoring	Duration of anesthesia	Duration of anesthesia≥2h	Amount of bleeding	Amount of bleeding≥10ml，Yes为1，否为2	Length of stay（days）	Rescue medication	Advence event	Mouth dryness（Yes is 1，no is 2）	Mouth dryness scores	urinary retention(Yes is 1， no is2）	Blurred vision（Yes is 1.No is 2）	Vomiting	Vomiting times	Vomiting time （Hours after the operation）	outconme（vomiting is 1，no vomiting is 0）	Nausea	Numeric Rating Scale for Nausea Intensity	Severe nausea with a score of 4 or higher, or vomiting	Remedial medications for nausea and vomiting	Additional intervention: 0 for Yes, 1 for No
2	0.111533	13	0	1	male	54	No	165	1.65	80	29.3848	Yes	0	Yes	No	2	10	25	50		203	0.7	1	Yes	1.1	No	1.1	12	1	1.5	No	2	2	8			2		2	2	No		24	0	No		No		1
3	0.97716	126	0	1	male	71	No	156	1.56	50	20.5457	No	0	Yes	No	3	0	45	70		408	1.3	2	Yes	1.9	No	0.8	14	1	2.3	Yes	15	1	8			2		2	2	No		24	0	No		No		1
4	0.721824	87	0	1	male	54	No	172	1.72	80	27.0416	Yes	0	Yes	No	2	10	50	50		522	1.8	2	Yes	2.8	Yes	1.5	9	1	3.2	Yes	20	1	7			2		2	2	No		24	0	No		No		1
5	0.808335	100	0	1	Female	62	No	150	1.5	50	22.2222	No	3	No	Yes	2	7.5	45	50		190	0.6	1	No	1	No	1	7	0	1.4	No	5	2	8			1	3	2	2	No		24	0	No		No		1
6	0.00605547	2	0	1	Female	35	Yes	160	1.6	58	22.6562	No	3	No	Yes	2	0	50	80		341	1.2	2	Yes	2.3	Yes	1	12	1	2.5	Yes	10	1	3			1	3	2	2	No		24	0	No		No		1
7	0.587293	61	0	1	male	61	No	160	1.6	75	29.2969	Yes	0	Yes	No	2	7.5	35		10	188	1	1	Yes	1	No	1	14	1	1.8	No	5	2	6			1	5	2	1	No		24	0	No		No		1
9	0.473223	51	0	1	Female	68	No	145	1.45	44	20.9275	No	3	No	Yes	2	0	50	90		445	1.9	1	No	7.7	Yes	7.7	15	2	8.6	Yes	100	1	10			1	6	2	1	No		24	0	No		No		1
11	0.511414	56	0	1	Female	25	Yes	163	1.63	60	22.5827	No	3	No	Yes	2	10	40	50		241	0.9	1	Yes	1.3	No	1.3	10	1	1.7	No	2	2	6			2		2	2	No		24	0	No		No		1
12	0.103168	12	0	1	male	41	Yes	168	1.68	73	25.8645	Yes	1	Yes	Yes	3	10	35	50		183	0.7	1	Yes	0.7	No	0.7	10	0	1.1	No	2	2	7			2		2	2	No		24	0	No		No		1
13	0.94126	120	0	2	male	56	No	175	1.75	55	17.9592	No	1	Yes	Yes	3	10	35		10	225	0.8	1	No	1	No	1	10	0	1.6	No	2	2	15			1	5	2	2	No		24	0	No		No		1
19	0.979432	128	0	1	male	60	No	169	1.69	80	28.0102	Yes	1	Yes	Yes	3	7.5	50	70		330	1.5	2	Yes	2	Yes	1	12	1	2.7	Yes	10	1	10			2		2	2	No		24	0	No		No		1
20	0.445977	47	0	2	male	72	No	171	1.71	70	23.939	No	1	Yes	Yes	2	10	25	50		160	0.5	1	No	0.6	No	0.6	10	1	1	No	1	2	6			1	3	2	1	No		24	0	No		No		1
21	0.470752	49	0	1	Female	57	No	158	1.58	50	20.0288	No	3	No	Yes	2	10	50	70		456	1.9	1	Yes	3.6	Yes	3.6	15	1	4.4	Yes	0	2	4			1	3	2	2	No		24	0	No		No		1
24	0.339329	33	0	1	male	42	Yes	168	1.68	73	25.8645	Yes	1	No	No	2	10	40	125		316	1.2	2	Yes	2.7	Yes	1.3	14	1	3.9	Yes	50	1	5			1	3	2	1	No		24	0	No		No		1
28	0.747407	92	0	1	Female	71	No	153	1.53	73	31.1846	Yes	3	No	Yes	3	7.5	25	50		140	0.5	1	No	0.8	No	0.8	11	0	1.1	No	1	2	14			1	2	2	2	No		24	0	No		No		1
30	0.011738	3	0	1	Female	33	Yes	162	1.62	58	22.1003	No	3	No	Yes	2	10	50	65		393	1.8	2	Yes	2.7	Yes	1.2	14	1	3.2	Yes	10	1	8			2		2	2	No		24	0	No		No		1
31	0.687003	84	0	1	Female	64	No	151	1.51	64	28.0689	Yes	2	No	Yes	3	10	45	94		547		2	Yes	3.1	Yes	1.3	12	1	3.6	Yes	50	1	7			1	1	2	2	No		24	0	No		No		1
35	0.655844	77	0	1	male	61	No	175	1.75	65	21.2245	No	1	Yes	Yes	3	0	20	40		100	0.97.	1	Yes	0.2	No	0.2	8	0	1	No	1	2	10			1	7	2	2	No		24	0	No		No		1
42	0.243635	24	0	1	Female	37	Yes	156	1.56	74	30.4076	Yes	3	No	Yes	2	7.5	40	70		220	1.4	2	Yes	2	Yes	1	6	0	3.3	Yes	10	1	6			1	2	2	2	No		24	0	No		No		1
44	0.503429	55	0	1	Female	74	No	161	1.61	51	19.6752	No	3	No	Yes	3	5	40	70		313	1.4	2	Yes	2	Yes	0.8	20	0	2.4	Yes	10	1	2.4			2		2	2	No		24	0	No		No		1
45	0.061208	8	0	1	Female	49	Yes	158	1.58	66	26.4381	Yes	3	No	Yes	2	5	35	72		353	2	2	Yes	1.8	No	0.6	10	0	2.5	Yes	50	1	9			1	3	2	2	No		24	0	No		No		1
46	0.941851	121	0	1	male	57	No	175	1.75	84	27.4286	Yes	1	Yes	Yes	2	7.5	25	50		193	0.5	1	Yes	0.7	No	0.7	8	0	1	No	2	2	5			2		2	2	No		24	0	No		No		1
49	0.471325	50	0	1	Female	60	No	156	1.56	55	22.6003	No	3	No	Yes	2	7.5	30	50		249	0.5	1	Yes	0.5	No	0.5	10	1	1	No	5	2	4			1	3	2	2	No		24	0	Yes	3	No		1
53	0.626426	67	0	1	male	42	Yes	171	1.71	80	27.3588	Yes	1	No	Yes	2	10	40	65		345	1.2	2	Yes	1.8	No	0.8	12	1	2.1	Yes	2.6	2	5			1	4	2	2	No		24	0	No		No		1
55	0.953278	124	0	1	male	58	No	160	1.6	55	21.4844	No	1	No	Yes	2	5	20	50		142	0.4	1	Yes	0.7	No	0.7	10	0	0.9	No	0	2	4			1	4	2	2	No		24	0	Yes	2	No		1
57	0.728833	88	0	1	male	39	Yes	180	1.8	70	21.6049	No	1	Yes	Yes	2	5	30	50		412	1.6	2	Yes	2.5	Yes	1.4	9	1	3	No	5	2	6			1	1	2	2	No		24	0	No		No		1
58	0.00161487	1	0	1	male	27	Yes	170	1.7	86	29.7578	Yes	1	Yes	Yes	2	5	40	100		388	1.2	2	Yes	1.6	No	0.5	11	1	2.3	Yes	20	1	5			1	2	2	2	No		24	0	No		No		1
61	0.909682	114	0	1	male	47	Yes	163	1.63	82	30.863	Yes	1	Yes	Yes	2	10	25	50		178	0.4	1	Yes	0.5	No	0.5	18	0	0.7	No	2	2	5			1	6	2	2	No		24	0	No		No		1
62	0.63749	71	0	1	male	38	Yes	160	1.6	65	25.3906	Yes	1	No	No	2	10	25	50		477	1.5	1	No	2.2	Yes	2.2	13	1	2.6	Yes	2	2	5			1	2	2	2	No		24	0	No		No		1
63	0.952602	123	0	1	Female	42	Yes	158	1.58	60	24.0346	Yes	3	No	Yes	2	5	30	100		351	1.7	2	Yes	2.6	Yes	1.3	12	0	3.1	Yes	20	1	6			1	4	2	2	No		24	0	Yes	3	No		1
65	0.818398	101	0	1	Female	47	Yes	158	1.58	55	22.0317	No	3	No	Yes	2	5	40		13	303	1.1	2	Yes	2.5	Yes	1.2	8	0	2.1	Yes	10	1	8			2		2	2	No		24	0	No		No		1
66	0.979099	127	0	1	male	35	Yes	160	1.6	60	23.4375	No	1	No	No	2	7.5	40	75		423	1.4	2	Yes	2.8	Yes	1.2	9	0	3.6	Yes	10	1	4			1	3	2	2	No		24	0	No		No		1
67	0.101839	11	0	1	Female	64	No	156	1.56	49	20.1348	No	3	No	Yes	2	5	25	50		117	0.2	1	Yes	0.6	No	0.6	9	0	1	No	1	2	4			1	8	2	2	No		24	0	No		No		1
68	0.676829	81	0	1	male	68	No	165	1.65	61	22.4059	No	1	Yes	No	2	5	30	50		240	0.8	1	No	1.3	No	1.3	11	2	2	Yes	1	2	5			1	6	2	1	No		24	0	Yes	2	No		1
71	0.957762	125	0	1	Female	59	No	155	1.55	55	22.8928	No	3	No	Yes	3	5	35		10	211	0.9	2	Yes	1.3	No	0.2	8	0	1.8	No	10	1	4			2		2	2	No		24	0	Yes		No		1
72	0.931347	116	0	1	Female	66	No	153	1.53	55	23.4952	No	3	No	Yes	2	5	40	65		271	1.2	2	Yes	1.7	No	0.6	7	0	2	Yes	10	1	6			2		2	2	No		24	0	Yes		No		1
76	0.486534	52	0	1	male	57	No	168	1.68	68	24.093	Yes	1	Yes	Yes	2	5	20	65		532	1.7	2	Yes	2.5	Yes	1.1	8	0	3.1	Yes	20	1	7			1	3	2	2	No		24	0	No		No		1
78	0.235626	22	0	1	Female	64	No	154	1.54	59	24.8777	Yes	3	No	Yes	2	12.5	25	50		226	1.1	1	No	1.3	No	1.3	6	0	1.6	No	5	2	50			1	4	2	1	No		24	0	No		No		1
81	0.275885	27	0	1	Female	69	No	158	1.58	50	20.0288	No	3	No	Yes	2	0.5	35	60		366	1.3	2	Yes	2.3	Yes	1.2	18	1	2.5	Yes	10	1	8			2		2	2	No		24	0	No		No		1
83	0.537277	57	0	1	Female	19	Yes	150	1.5	55	24.4444	Yes	3	No	Yes	2	5	25	50		231	2.2	1	No	1	No	1	6	1	1.7	No	0	2	9			1	7	2	2	Yes	2	4	1	Yes	4	Yes		1
84	0.0973768	10	0	1	male	49	Yes	174	1.74	74	24.4418	Yes	0	Yes	No	2	10	30	50		258	0.8	1	Yes	0.7	No	0.7	10	1	1.3	No	1	2	11			1	5	2	2	No		24	0	No		No		1
86	0.35944	35	0	1	male	54	No	173	1.73	78	26.0617	Yes	1	Yes	No	2	5	30	50		186	0.4	1	Yes	0.25	No	0.3	10	1	1	No	2	2	3			1	4	2	2	Yes	1	4	1	Yes	3	Yes		1
87	0.136074	16	0	1	male	42	Yes	168	1.68	80	28.3447	Yes	0	Yes	No	2	7.5	45	75		395	1.8	2	Yes	1.8	No	0.7	8	1	2.1	Yes	10	1	7			1	6	2	2	No		24	0	No		No		1
88	0.679063	82	0	1	male	48	Yes	165	1.65	70	25.7117	Yes	1	Yes	Yes	2	12.5	30	115		260	1.3	1	No	1.2	No	1.2	13	1	1.6	No	2	2	7			2		2	2	No		24	0	No		No		1
93	0.803208	99	0	1	male	67	No	160	1.6	60	23.4375	No	1	Yes	Yes	3	7.5	25	50		230	0.9	1	Yes	1	No	1	13	1	1.4	No	2	2	5			2		2	2	No		24	0	No		No		1
94	0.486557	53	0	1	Female	55	No	160	1.6	71	27.7344	Yes	3	No	Yes	2	10	35	80		246	1.2	2	Yes	1.8	No	0.8	12	1	2.2	Yes	10	1	7			2		2	2	No		24	0	No		No		1
95	0.183112	19	0	1	male	67	No	165	1.65	60	22.0386	No	1	No	Yes	2	10	25		10	117	0.4	1	No	0.8	No	0.8	13	1	1.2	No	1	2	13			2		2	2	No		24	0	No		No		1
97	0.778429	95	0	1	male	78	No	160	1.6	50	19.5312	No	3	No	Yes	3	5	25	70		742	2.3	2	Yes	4	Yes	2.6	15	1	4.5	Yes	10	1	15			2		2	2	No		24	0	No		No		1
98	0.937101	118	0	2	male	52	No	165	1.65	65	23.8751	No	1	Yes	Yes	2	5	40	80		440	1.7	2	Yes	2.5	Yes	1.1	9	1	3.5	Yes	20	1	6			2		2	2	No		24	0	No		No		1
100	0.60541	63	0	1	male	71	No	157	1.57	47	19.0677	No	1	Yes	Yes	3	2.5	15	70		286	1.1	1	No	2.5	Yes	2.5	10.1	1	2.8	Yes	5	2	14			2		2	2	No		24	0	No		No		1
103	0.998312	130	0	1	male	70	No	165	1.65	70	25.7117	Yes	1	Yes	Yes	2	5	25	75		338	1.6	1	No	2.5	Yes	2.5	11	1	3.1	Yes	5	2	7			1	3	2	2	No		24	0	No		No		1
104	0.738599	91	0	1	Female	69	No	160	1.6	52	20.3125	No	3	No	Yes	2	7.5	30	50		90	0.6	1	Yes	0.9	No	0.9	11.4	1	1.7	No	2	2	14			2		2	2	No		24	0	No		No		1
106	0.616283	66	0	1	male	71	No	168	1.68	71	25.1559	Yes	0	Yes	No	2	0	30	65		490	1.6	2	Yes	3	Yes	1.8	10.1	1	3.4	Yes	20	1	7			2		2	2	No		24	0	No		No		1
107	0.376739	37	0	1	male	42	Yes	167	1.67	68	24.3824	Yes	1	No	No	2	5	35		10	450	1.6	2	Yes	2	Yes	1.6	8.9	1	2.2	Yes	10	1	8			2		2	2	No		24	0	No		No		1
109	0.64219	73	0	1	Female	49	Yes	150	1.5	52	23.1111	No	3	No	Yes	2							2	No	9.5	Yes	1.2	5.1	1	3.6	Yes	20	1	5			2		2	2	No		24	0	No		No		1
111	0.878687	111	0	1	male	60	No	170	1.7	65	22.4913	No	1	Yes	Yes	2	5	30	70		786	1.9	2	Yes	4	Yes	2	14	1	4.6	Yes	20	1	26			2		2	2	No		24	0	No		No		1
112	0.668075	79	0	1	Female	52	No	150	1.5	55	24.4444	Yes	3	No	Yes	2	2.5	30	45		280	0.6	1	No	1	No	1	10	1	1.5	No	0	2	46			2		2	2	No		24	0	No		No		1
114	0.934091	117	0	1	male	62	No	170	1.7	70	24.2215	No	1	No	No	2	5	30	50		350	1.1	2	Yes	2	Yes	0.8	5.6	1	2.6	Yes	5	2	6			2		2	2	No		24	0	No		No		1
118	0.380242	38	0	1	Female	29	Yes	162	1.62	70	26.6728	Yes	3	No	Yes	2	5	35	70		398	1.3	2	Yes	1.9	No	0.8	12	1	2.5	Yes	10	1	7			2		2	2	No		24	0	No		No		1
120	0.306808	29	0	1	Female	69	No	155	1.55	65	27.0552	Yes	3	No	Yes	3	7.5	25	50		303	1.8	1	Yes	2.2	Yes	1.2	8	1	2.8	Yes	20	1	7			2		2	2	No		24	0	No		No		1
122	0.568518	59	0	1	Female	76	No	160	1.6	60	23.4375	No	3	No	Yes	3	0	35	75		373	1.6	2	No	3	Yes	1.5	9	1	3.3	Yes	100	1	10			2		2	2	No		24	0	No		No		1
123	0.831444	102	0	1	male	59	No	165	1.65	70	25.7117	Yes	1	No	No	2	5	35	65		450	2	2	No	2.7	Yes	1.4	11	1	3.1	Yes	20	1	6			2		2	2	No		24	0	No		No		1
124	0.941049	119	0	1	male	60	No	170	1.7	70	24.2215	Yes	1	Yes	Yes	2	7.5	30		15	346	1.3	2	No	2	Yes	1	18	1	2.5	Yes	10	1	9			2		2	2	No		24	0	No		No		1
128	0.552301	58	0	1	Female	19	Yes	160	1.6	45	17.5781	No	3	No	Yes	2	5	25	50		305	0.7	1	Yes	1.2	No	1.2	12	1	1.7	No	1	2	8			1	3	2	2	No		24	0	No		No		1
129	0.792939	98	0	1	male	42	Yes	160	1.6	66	25.7812	Yes	0	Yes	No	2	5	25	50		280	0.7	1	Yes	1.2	No	1.2	12	1	1.6	No	1	2	4			2		2	2	Yes	1	3	1	Yes	5	Yes	Metoclopramide 10mg intravenous drip	0
1	0.0451341	5	1	1	male	58	No	167	1.67	55	19.721	No	1	Yes	Yes	2	25	30	50		410	1.3	1	No	2	Yes	2	11	0	2.7	Yes	2	2	18			1	3	2	2	No		24	0	No		No		1
8	0.119924	15	1	1	Female	76	No	155	1.55	44	18.3143	No	3	No	Yes	3	12.5	40	70		495	1.7	2	Yes	2.8	Yes	1.2	12	1	3.5	Yes	20	1	7			1	2	2	2	No		24	0	No		No		1
10	0.653652	76	1	1	Female	67	No	155	1.55	63	26.2227	Yes	3	No	Yes	2	7.5	35		10	528	0.9	1	Yes	1.8	No	1.8	14	1	2.1	Yes	10	1	9			1	5	2	2	No		24	0	No		No		1
14	0.733995	89	1	1	Female	32	Yes	164	1.64	63	23.4236	No	3	No	Yes	2	10	40		14	340	1.7	2	Yes	2.5	Yes	1.4	12	0	2.8	Yes	20	1	5			1	3	2	2	No		24	0	No		No		1
15	0.413101	39	1	1	male	69	No	160	1.6	70	27.3438	Yes	1	Yes	Yes	3	7.5	50		20	263	1.2	2	Yes	2.2	Yes	1.2	13	1	2.6	Yes	20	1	5			1	3	2	2	No		24	0	No		No		1
16	0.635215	70	1	1	male	66	No	170	1.7	77	26.6436	Yes	1	Yes	Yes	2	10	50		30	642	2.3	2	Yes	4.5	Yes	2.8	14	1	5.8	Yes	50	1	7			1	6	2	2	No		24	0	No		No		1
17	0.439533	45	1	1	Female	20	Yes	164	1.64	62	23.0518	No	3	No	Yes	2	7.5	45	75		542	1.4	2	Yes	2.6	Yes	1.2	15	1	3.3	Yes	5	2	4			1	3	2	2	Yes	4	3	1	Yes	4	Yes	Ondansetron 8mg and metoclopramide 10mg intravenous drip	0
18	0.690852	85	1	2	Female	57	No	158	1.58	75	30.0433	Yes	3	No	Yes	2	10	45		10	370	1.3	1	No	1.4	No	1.4	13	1	2.2	Yes	2	2	13			1	4	2	2	Yes	1	3	1	Yes	3	Yes		1
22	0.659303	78	1	1	Female	52	No	153	1.53	57	24.3496	Yes	3	No	Yes	3	10	35	70		278	0.9	2	Yes	1.8	No	0.5	13	1	3.2	Yes	10	1	6			2		2	1	No		24	0	No		No		1
23	0.612035	64	1	1	Female	59	No	155	1.55	68	28.3039	Yes	3	No	Yes	2	10	30	75		317	1.1	2	Yes	2.6	Yes	1.2	12	1	3	Yes	30	1	5			1	2	2	2	No		24	0	No		No		1
25	0.85261	108	1	1	Female	50	No	158	1.58	58	23.2335	No	3	No	Yes	2	10	45	50		310	1.2	2	Yes	1.8	No	0.5	16	1	2.3	Yes	2	2	6			2		2	2	Yes	1	2	1	Yes	2	Yes		1
26	0.848307	106	1	1	male	48	Yes	160	1.6	60	23.4375	No	1	No	No	2	7.5	35	50		253	1	2	Yes	1.5	No	0.5	14	1	2.4	Yes	10	1	7			1	3	2	2	No		24	0	Yes	2	No		1
27	0.488135	54	1	1	Female	33	Yes	158	1.58	77	30.8444	Yes	3	No	Yes	2	5	35	100		262	0.5	1	Yes	0.8	No	0.8	13	1	1.1	No	1	2	3			2		2	2	No		24	0	Yes	5	Yes		1
29	0.735598	90	1	1	male	55	No	166	1.66	68	24.677	Yes	1	Yes	No	2	7.5	20	50		115	0.7	1	Yes	0.8	No	0.8	10	0	1.3	No	2	2	7			1	2	2	1	No		24	0	No		No		1
32	0.858459	110	1	1	Female	42	Yes	154	1.54	65	27.4077	Yes	3	No	Yes	2	7.5	30	50		245	0.9	1	Yes	1.5	No	1.5	15	1	2	Yes	0	2	4			1	3	2	2	Yes	1	4	1	Yes	2	Yes	Metoclopramide 10mg intravenous drip	0
33	0.0577672	7	1	1	male	45	Yes	162	1.62	59	22.4813	No	1	Yes	Yes	2	7.5	35	50		191	0.6	1	Yes	0.7	No	0.7	8	0	1.7	No	2	2	4			1	2	2	2	No		24	0	No		No		1
34	0.785606	97	1	1	male	28	Yes	167	1.67	79	28.3266	Yes	1	Yes	Yes	2	10	50	75		393	1.5	2	Yes	2.8	Yes	1.5	13	0	3.3	Yes	20	1	7			2		2	2	No		24	0	No		No		1
36	0.63897	72	1	1	male	38	Yes	170	1.7	60	20.7612	No	1	Yes	Yes	3	0	25		10	396	1.3	1	No	2.1	Yes	2.1	16	2	2.8	Yes	2	2	51			1	10	2	2	Yes	1	7	1	Yes	8	Yes		1
37	0.835516	103	1	1	Female	59	No	151	1.51	50	21.9289	No	3	No	Yes	2	15	50	50		387	1.4	2	Yes	1.8	No	0.5	13	0	2.5	Yes	20	1	6			1	5	2	2	No		24	0	Yes	2	No	Metoclopramide 10mg intravenous drip	0
38	0.415793	40	1	1	Female	60	No	153	1.53	43	18.369	No	3	No	Yes	2	15	40	50		201	1	2	Yes	1.7	No	0.6	9	0	2.3	Yes	20	1	9			1	6	2	2	Yes	2	3	1	No		Yes		1
39	0.338347	32	1	1	male	53	No	170	1.7	75	25.9516	Yes	1	No	No	3	20	30	50		251	1.7	1	No	1.7	No	1.8	10	1	3	Yes	2	2	65			1	3	2	2	No		24	0	No		No		1
40	0.851486	107	1	1	male	52	No	163	1.63	62	23.3355	No	1	No	No	2	10	25	50		225	0.6	1	Yes	0.7	No	0.7	18	0	1.3	No	1	2	6			1	3	2	2	No		24	0	No		No		1
41	0.648393	74	1	1	Female	36	Yes	172	1.72	59	19.9432	No	3	No	Yes	2	7.5	35	70		338	1.6	2	Yes	2.4	Yes	1.5	12	1	2.7	Yes	50	1	6			1	3	2	2	No		24	0	No		No		1
43	0.842639	105	1	2	Female	74	No	162	1.62	75	28.578	Yes	3	No	Yes	2	10	45	70		336	1.5	2	Yes	2.2	Yes	1.2	10	1	2.8	Yes	10	1	7			1	4	2	2	No		24	0	No		No		1
47	0.440936	46	1	1	male	68	No	160	1.6	53	20.7031	Yes	1	Yes	Yes	3	2.5	40		10	184	0.8	1	No	1.4	No	1.4	13	1	1.9	No	5	2	27			1	3	2	2	No		24	0	No		No		1
48	0.626474	68	1	1	Female	29	Yes	168	1.68	48	17.0068	No	3	No	Yes	2	5	50	75		326	1.2	2	Yes	1.9	No	0.8	15	1	2.2	Yes	5	2	7			1	3	2	2	No		24	0	No		No		1
50	0.316593	30	1	1	male	55	No	170	1.7	75	25.9516	Yes	1	No	Yes	2	7.5	50	75		608	1.4	2	Yes	1.9	No	0.7	8	1	2.33	Yes	10	1	8			2		2	2	No		24	0	No		No		1
51	0.893751	113	1	1	male	56	No	170	1.7	60	20.7612	No	1	No	Yes	2	7.5	25	50		135	0.3	1	No	0.4	No	0.4	14	1	0.9	No	5	2	10			1	4	2	2	No		24	0	No		No		1
52	0.454679	48	1	1	male	31	Yes	170	1.7	72	24.9135	Yes	1	No	Yes	2	10	40	50		178	0.5	1	Yes	0.5	No	0.5	13	0	1.3	No	2	2	6			1	5	2	2	No		24	0	No		No		1
54	0.19134	20	1	1	male	70	No	169	1.69	80	28.0102	Yes	1	No	Yes	2	7.5	25	50		200	0.6	1	No	0.9	No	0.9	13	1	1.3	No	10	1	23			1	4	2	2	No		24	0	No		No		1
56	0.941908	122	1	1	Female	76	No	160	1.6	55	21.4844	No	2	No	No	2	5	25		10	154	0.5	1	Yes	1	No	1	15	1	1.5	No	2	2	9			1	4	2	2	No		24	0	No		No		1
59	0.175587	18	1	1	male	79	No	159	1.59	47	18.591	No	1	Yes	Yes	3	2.5	30	80		344	1.2	2	Yes	2.5	Yes	1.2	14	1	3	Yes	10	1	9			1	6	2	2	No		24	0	No		No		1
60	0.417716	41	1	1	male	60	No	160	1.6	69	26.9531	Yes	1	Yes	Yes	2	5	35	70		410	1.5	2	Yes	2	Yes	0.9	10	1	2.4	Yes	10	1	4			1	6	2	2	No		24	0	No		No		1
64	0.675424	80	1	1	male	77	No	162	1.62	66	25.1486	Yes	1	Yes	No	3	5	20		10	118	0.5	1	Yes	1	No	1	15	1	2	Yes	2	2	45			2		2	2	No		24	0	Yes	3	No		1
69	0.425457	42	1	1	Female	69	No	160	1.6	71	27.7344	Yes	3	No	Yes	2	5	30	80		228	1.1	2	Yes	1.3	No	0.3	18	0	1.8	No	20	1	4			1	9	2	1	No		24	0	Yes	3	No		1
70	0.772366	94	1	1	Female	53	No	152	1.52	46	19.91	No	3	No	Yes	2	7.5	40	65		271	1.5	2	Yes	2.1	Yes	1.2	8	0	2.4	Yes	20	1	6			1	6	2	2	Yes	2	4	1	Yes	2	Yes		1
73	0.691986	86	1	1	Female	64	No	165	1.65	58	21.3039	No	3	No	Yes	2	7.5	30	50		230	0.9	2	Yes	1.3	No	0.3	13	0	1.5	No	10	1	6			1	3	2	2	Yes	1	5	1	Yes	3	Yes		1
74	0.325829	31	1	1	male	53	No	168	1.68	70	24.8016	Yes	1	No	Yes	2	5	25	50		340	1.1	2	Yes	1.5	No	0.4	12	0	2	Yes	10	1	10			1	2	2	2	No		24	0	Yes	1	No		1
75	0.604198	62	1	1	Female	59	No	150	1.5	50	22.2222	No	3	No	Yes	2	5	25	50		250	0.8	2	Yes	1.1	No	0.3	12	1	1.6	No	10	1	14			1	7	2	2	No		24	0	Yes	3	No	Metoclopramide 10mg intravenous drip	0
77	0.680487	83	1	1	Female	30	Yes	155	1.55	56	23.3091	No	3	No	Yes	2	12.5	40	70		258	1.3	2	Yes	1.5	No	0.5	8	0	2.1	Yes	5	2	6			1	6	2	2	No		24	0	Yes	1	No		1
79	0.0386181	4	1	1	Female	32	Yes	162	1.62	46	17.5278	No	3	No	Yes	2	12.5	25	50		161	0.5	1	Yes	0.8	No	0.8	7	0	1	No	5	2	3			1	1	2	2	No		24	0	No		No		1
80	0.114131	14	1	1	Female	74	No	159	1.59	53	20.9644	No	3	No	Yes	2	5	25	50		438	1.8	2	Yes	2.8	Yes	1.5	10	0	3.4	Yes	10	1	8			1	7	2	2	No		24	0	No		No		1
82	0.993187	129	1	2	Female	47	Yes	155	1.55	60	24.974	Yes	3	No	Yes	2	5	30	65		262	0.9	2	Yes	1.3	No	0.3	12	1	1.9	No	10	1	8			1	7	2	2	Yes	2	6	1	Yes	5	Yes		1
85	0.266568	26	1	1	Female	77	No	148	1.48	45	20.5442	No	3	No	Yes	3	5	25	50		245	0.8	2	Yes	1.5	No	0.5	20	1	1.9	No	2	2	4			1	5	2	2	Yes	1	6	1	Yes	3	Yes		1
89	0.880488	112	1	1	male	67	No	170	1.7	76	26.2976	Yes	1	Yes	Yes	3	5	35	100		368	1.3	2	Yes	2	Yes	1	15	1	2.5	Yes	10	1	7			2		2	2	No		24	0	No		No		1
90	0.432598	43	1	1	male	37	Yes	169	1.69	62	21.7079	No	1	Yes	Yes	2	12.5	30	50		162	0.3	1	No	0.3	No	0.3	10	1	0.8	No	0	2	15			2		2	2	No		24	0	No		No		1
91	0.0723751	9	1	1	Female	59	No	157	1.57	69	27.993	Yes	3	No	Yes	2	5	35	100		300	1.7	2	Yes	1.8	No	0.7	8	1	2.2	Yes	10	1	7			2		2	2	No		24	0	No		No		1
92	0.853589	109	1	1	male	57	No	155	1.55	63	26.2227	Yes	1	Yes	Yes	2	5	30	65		273	1	2	Yes	2	Yes	1	14	1	3.2	Yes	10	1	6			2		2	2	No		24	0	No		No		1
96	0.91755	115	1	1	Female	63	No	158	1.58	65	26.0375	Yes	3	No	Yes	3	10	20	50		481	2	1	Yes	4	Yes	4	10	1	4.2	Yes	0	2	6			2		2	2	No		24	0	No		No		1
99	0.204817	21	1	1	Female	20	Yes	163	1.63	52	19.5717	No	3	No	Yes	1	5	40	75		365	1.2	2	Yes	2.4	Yes	1.3	11	1	2.7	Yes	10	1	7			2		2	2	No		24	0	No		No		1
101	0.613402	65	1	1	Female	55	No	152	1.52	50	21.6413	No	3	No	Yes	2	5	30	75		400	1.4	2	Yes	2.8	Yes	1.5	7	1	3.1	Yes	10	1	6			2		2	2	No		24	0	No		No		1
102	0.648906	75	1	1	male	53	No	178	1.78	80	25.2493	Yes	0	Yes	No	3	2.5	25	125		213	1.2	2	Yes	2.4	Yes	1.6	4.1	1	2.6	Yes	10	1	7			2		2	2	No		24	0	No		No		1
105	0.783203	96	1	1	male	71	No	167	1.67	55	19.721	No	0	Yes	No	2	5	30	100		415	1.1	2	Yes	2.1	Yes	1	8.9	1	2.6	Yes	10	1	7			2		2	2	No		24	0	No		No		1
108	0.571524	60	1	1	male	26	Yes	168	1.68	75	26.5731	Yes	1	No	No	2	7.5	40	100		449	1.5	2	Yes	2	Yes	1	7.8	1	2.6	Yes	10	1	25			2		2	2	No		24	0	No		No		1
110	0.634544	69	1	1	Female	50	No	150	1.5	53	23.5556	No	3	No	Yes	2	5	30	50		228	0.7	1	Yes	0.7	No	0.7	9	1	1.3	No	2	2	4			2		2	2	No		24	0	No		No		1
113	0.341532	34	1	1	Female	20	Yes	148	1.48	55	25.1096	Yes	3	No	Yes	2	12.5	20	60		395	1.2	2	Yes	1	No	0.2	9.1	1	2.8	Yes	10	1	15			2		2	2	No		24	0	No		No		1
115	0.433035	44	1	1	male	52	No	158	1.58	80	32.0461	Yes	1	Yes	Yes	2	7.5	35	65		364	1.3	2	Yes	1.9	No	0.8	9.3	1	2.5	Yes	10	1	7			2		2	2	No		24	0	No		No		1
116	0.755556	93	1	1	Female	42	Yes	155	1.55	85	35.3798	Yes	3	No	Yes	3	7.5	40	70		332	1.2	2	No	2.2	Yes	1	7.6	1	3.1	Yes	10	1	7			2		2	2	No		24	0	No		No		1
117	0.261006	25	1	1	Female	76	No	160	1.6	60	23.4375	No	3	No	Yes	2	0	20	50		226	0.7	1	No	0.9	No	0.9	7.8	1	1.3	No	1	2	15			2		2	2	No		24	0	No		No		1
119	0.295808	28	1	1	male	61	No	172	1.72	75	25.3515	Yes	1	Yes	Yes	2	2.5	35	55		490	2.4	2	Yes	2.4	Yes	1.3	15	1	2.8	Yes	10	1	8			2		2	2	No		24	0	No		No		1
121	0.238188	23	1	1	Female	50	No	155	1.55	62	25.8065	Yes	3	No	Yes	2	10	30	70		433	0.9	2	Yes	2.4	Yes	1.6	9	1	3.3	Yes	20	1	14			2		2	2	No		24	0	No		No		1
125	0.170933	17	1	1	male	46	Yes	173	1.73	68	22.7204	No	1	Yes	Yes	2	7.5	35	50		340	0.9	2	No	1.2	No	0.5	8	1	2.6	Yes	10	1	6			1		2	2	No		24	0	No		No		1
126	0.0512775	6	1	1	Female	59	No	150	1.5	41	18.2222	No	3	No	Yes	2	0	20	35		200	0.3	1	Yes	0.8	No	0.8	12	2	1.1	No	1	2	6			1		2	2	No		24	0	No		No		1
127	0.370383	36	1	1	male	71	No	160	1.6	51	19.9219	No	1	Yes	No	2	5	20	50		322	0.7	1	No	1.2	No	1.2	9	0	1.5	No	1	2	12			1	3	2	2	Yes	3	3	1	Yes	5	Yes	Tropisetron 2mg intravenous drip	0
130	0.839794	104	1	2	Female	47	Yes	158	1.58	65	26.0375	Yes	3	No	Yes	3	5	35		10	366	1.3	1	Yes	2.3	Yes	2.3	10	2	3	Yes	1	2	21			1	5	2	2	Yes	1	1	1	Yes	5	Yes		1
